# Supplementary material for: Functional assessment of the cell-autonomous role of NADase CD38 in regulating CD8+ T cell exhaustion
Source: PubMed Central journal article supplement — iScience. 2022 May 4;25(5):104347. doi: 10.1016/j.isci.2022.104347 (PMC9117873; doi:10.1016/j.isci.2022.104347), 2022-05-04
Supplement: mmc1.pdf [file mmc1.pdf]

**iScience, Volume 25**

**Supplemental information**

**Functional assessment of the cell-autonomous  
role of NADase CD38 in regulating  
CD8<sup>+</sup> T cell exhaustion**

**Kaili Ma, Lina Sun, Mingjing Shen, Xin Zhang, Zhen Xiao, Jiajia Wang, Xiaowei Liu, Kanqiu Jiang, F. Xiao-Feng Qin, Feng Guo, Baojun Zhang, and Lianjun Zhang**

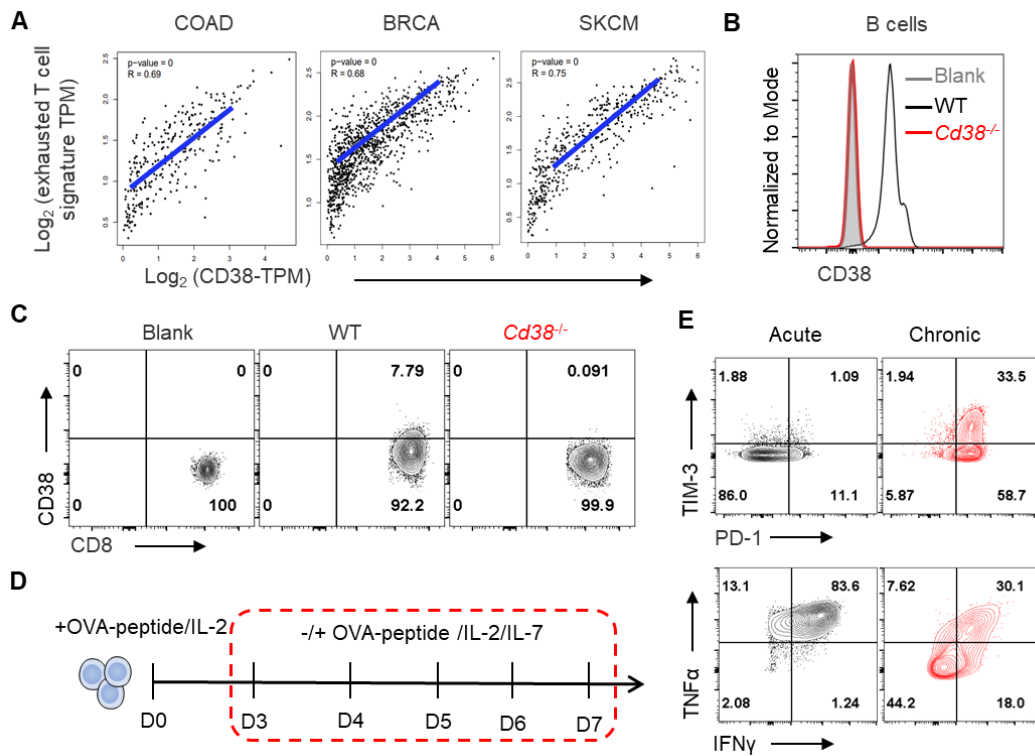

**Figure S1. Flow cytometry analysis the expression of CD38 and antigen chronic stimulation model, Related to Figure 1. (A)** The correlation between the expression of CD38 and exhausted T-cell signature genes in human colon adenocarcinoma (COAD), breast invasive carcinoma (BRCA), or skin cutaneous melanoma (SKCM) was performed using the GEPIA 2 online tool (Tang et al., 2019). TPM, transcripts per kilobase of exon model per million mapped reads. **(B)** Flow cytometry analysis of CD38 expression in WT or *Cd38*<sup>-/-</sup> mice B cells. **(C)** Representative FACS plots of CD38 expression in WT or *Cd38*<sup>-/-</sup> OT-1 cells at 4<sup>th</sup> day after activation. **(D)** Schematic representation of antigen persistent stimulation model. **(E)** Analysis of PD-1, TIM-3 expression and cytokines TNF $\alpha$ , IFN $\gamma$  production of OT-1 cells after persistent antigen stimulation or not.

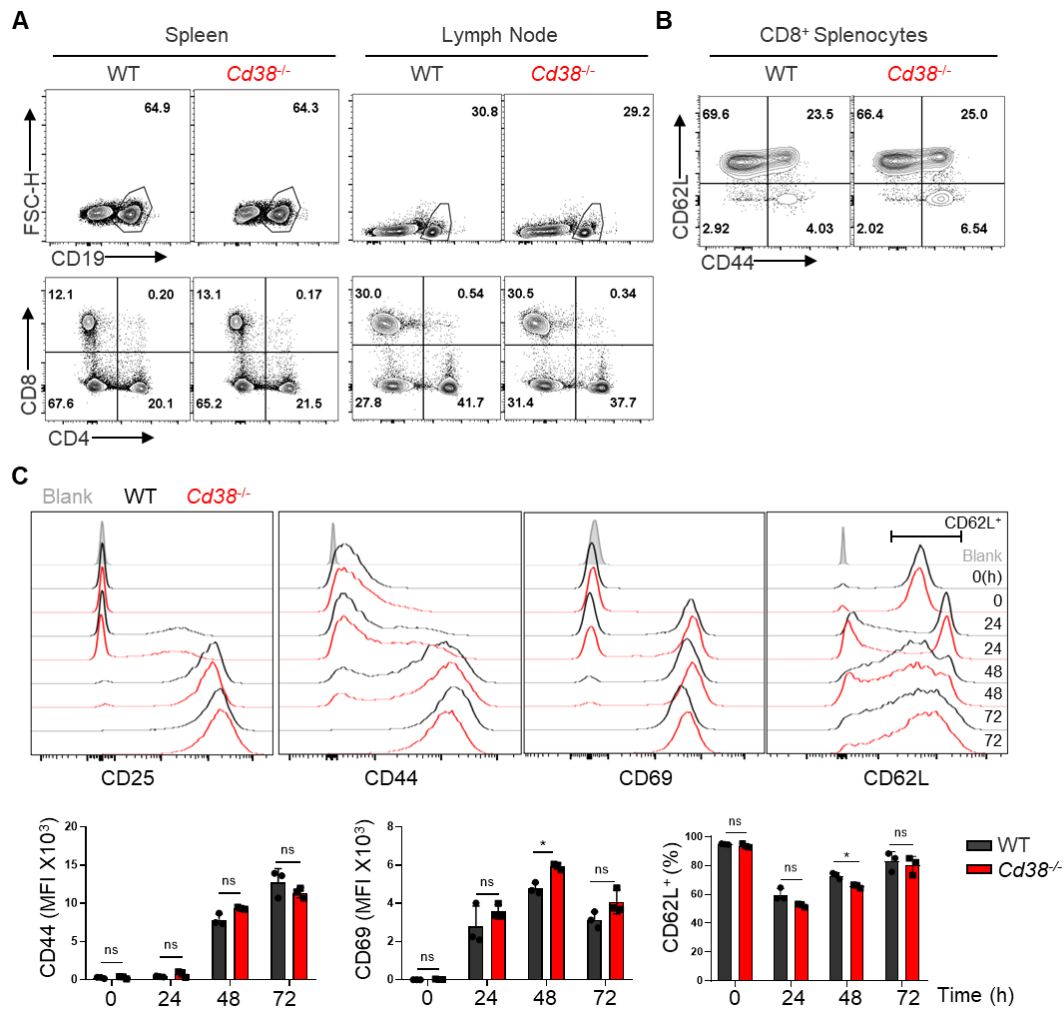

**Figure S2. The development and activation phenotype of *Cd38* knockout CD8<sup>+</sup> T cells, Related to Figure 2.** (A) Representative contour plots of CD4, CD8<sup>+</sup> or B cells in splenocytes or lymph node cells from 8-week-old mice of the indicated genotypes, respectively. (B) Representative contour plots of CD62L and CD44 expression in CD8<sup>+</sup> T cells from the spleen of WT or *Cd38<sup>-/-</sup>* mice. (C) Upper: The representative histogram of surface activation marker CD25, CD44, CD69 and CD62L expression in WT or *Cd38<sup>-/-</sup>* OT-1 cells during  $\alpha$ CD3/CD28 activation. Down: statistical analysis of activation markers expression. Data are shown as Mean  $\pm$  SD (n = 3), Student's t-test, \*: P < 0.05; ns: not significant.

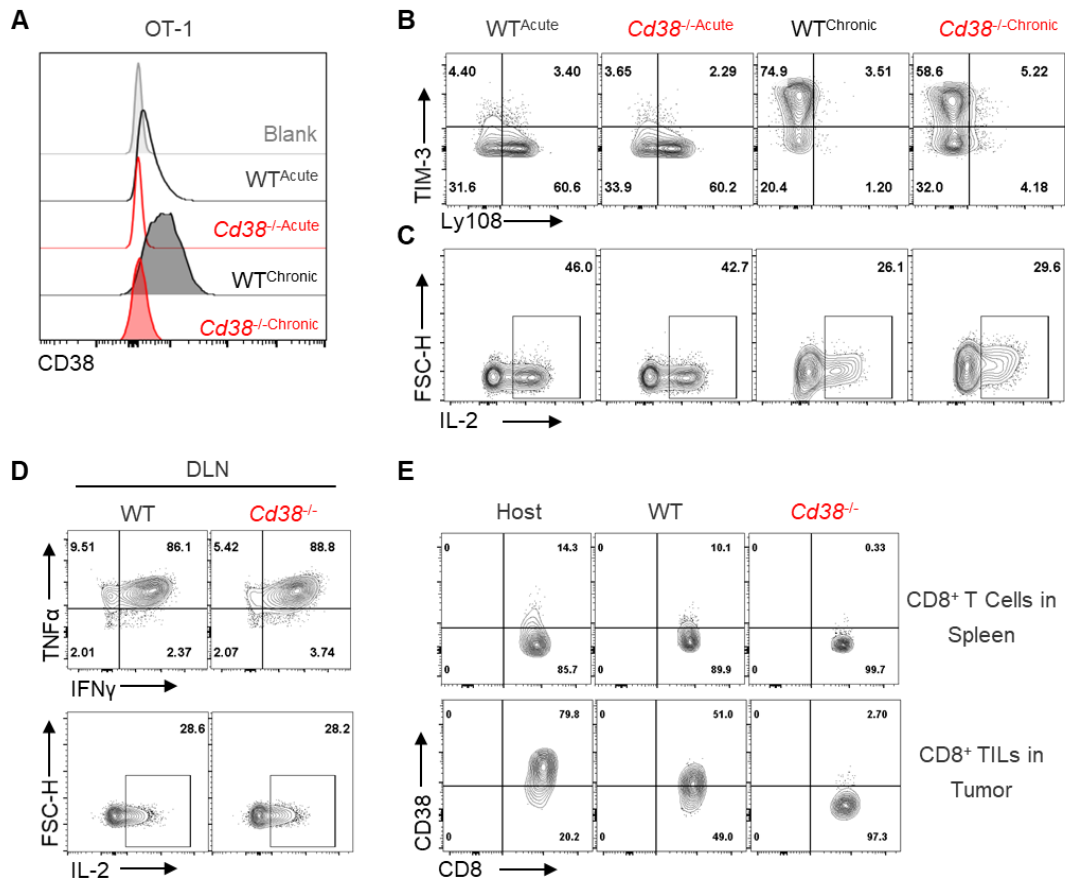

**Figure S3. Specific flow cytometry information, Related to Figure 3 and 4.** (A) The representative histogram of CD38 expression in indicated cells. (B) Representative contour plots of Ly108 and TIM-3 expression in WT or *Cd38*<sup>-/-</sup> OT-1 cells after persistent antigen stimulation or not. (C) Representative contour plots of IL-2 expression of indicated cells after treatment. (D) Representative contour plots of indicated OT-1 cells from recipient mice DLN producing cytokines TNF $\alpha$ , IFN $\gamma$ , IL-2 after stimulation with PMA and Ionomycin. (E) The representative contour plots of CD38 expression in tumor infiltrated host, adoptive transferred WT or CD38 knockout CD8<sup>+</sup> T cells.

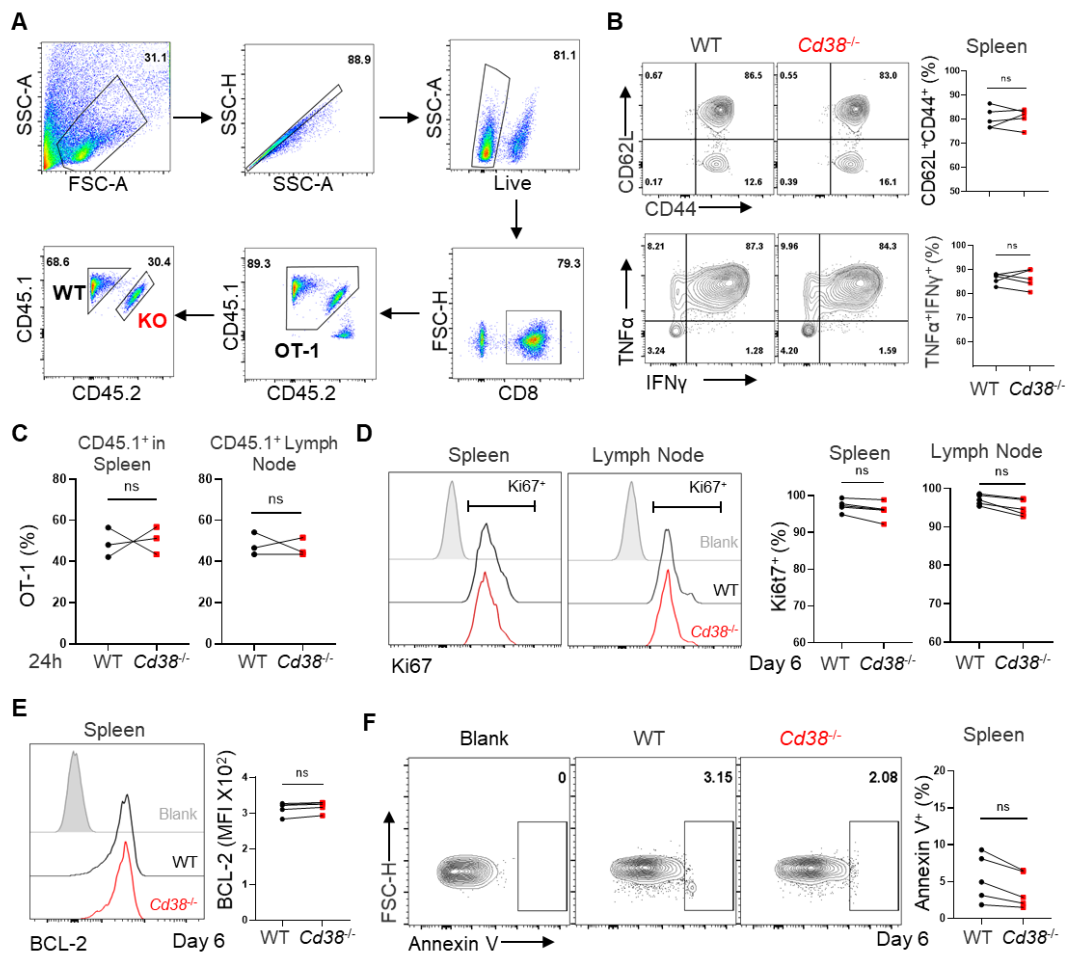

**Figure S4. The deficiency of CD38 did not impact the migration and apoptosis of OT-1 cells in vivo, Related to Figure 5. (A)** Representative FACS plots of gating scheme for WT and CD38 knockout OT-1 cells. **(B)** Left: representative contour plots of CD62L, CD44 expression, or TNF $\alpha$ , IFN $\gamma$  production in two genotypes OT-1 cells from recipient mice spleen. Right: summary of the frequencies of CD62L<sup>+</sup>CD44<sup>+</sup> or TNF $\alpha$ <sup>+</sup>IFN $\gamma$ <sup>+</sup> OT-1 cells in the spleen. Above all error bars in this figure indicate Mean  $\pm$  SD (n = 5), Student's t-test, ns: not significant. **(C)** Naïve WT or *Cd38*<sup>-/-</sup> OT-1 cells were mixed at a 1:1 ratio, and then were co-adoptive transferred in recipient mice. Analysis percentage of indicated OT-1 cells in total transferred OT-1 cells of recipient mice spleen after 24 h. **(D)** Flow cytometry analysis and summary of Ki67<sup>+</sup> WT or *Cd38*<sup>-/-</sup> OT-1 cells in the spleen and lymph node at day 6 post OVA peptide-stimulation as Fig.5f. **(E)** Histogram and summary of BCL-2 expression in the recipient mice spleen OT-1 cells. **(F)** Representative contour plots and summary of Annexin V<sup>+</sup> WT or *Cd38*<sup>-/-</sup> OT-1 cells in the spleen at day 6 post activation by OVA peptide.

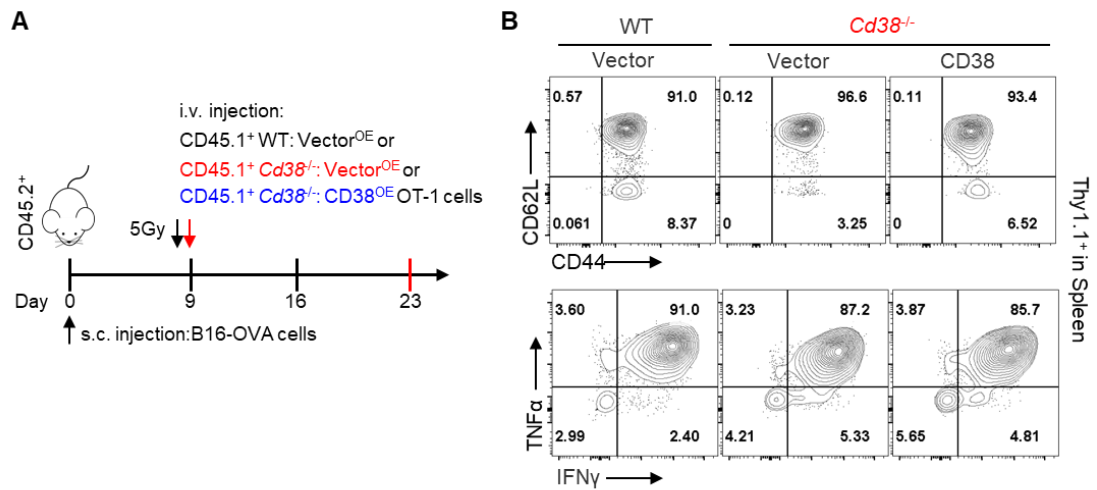

**Figure S5. The phenotype of CD38 overexpressed OT-1 cells in the spleen, Related to Figure 6.** (A) Schematic representation of adoptive transfer indicated OT-1 cells with CD38 overexpression or not in the tumor model. (B) Representative contour plots of CD62L, CD44 expression, or TNF $\alpha$ , IFN $\gamma$  production of three Thy1.1<sup>+</sup> groups in recipient mice spleen.

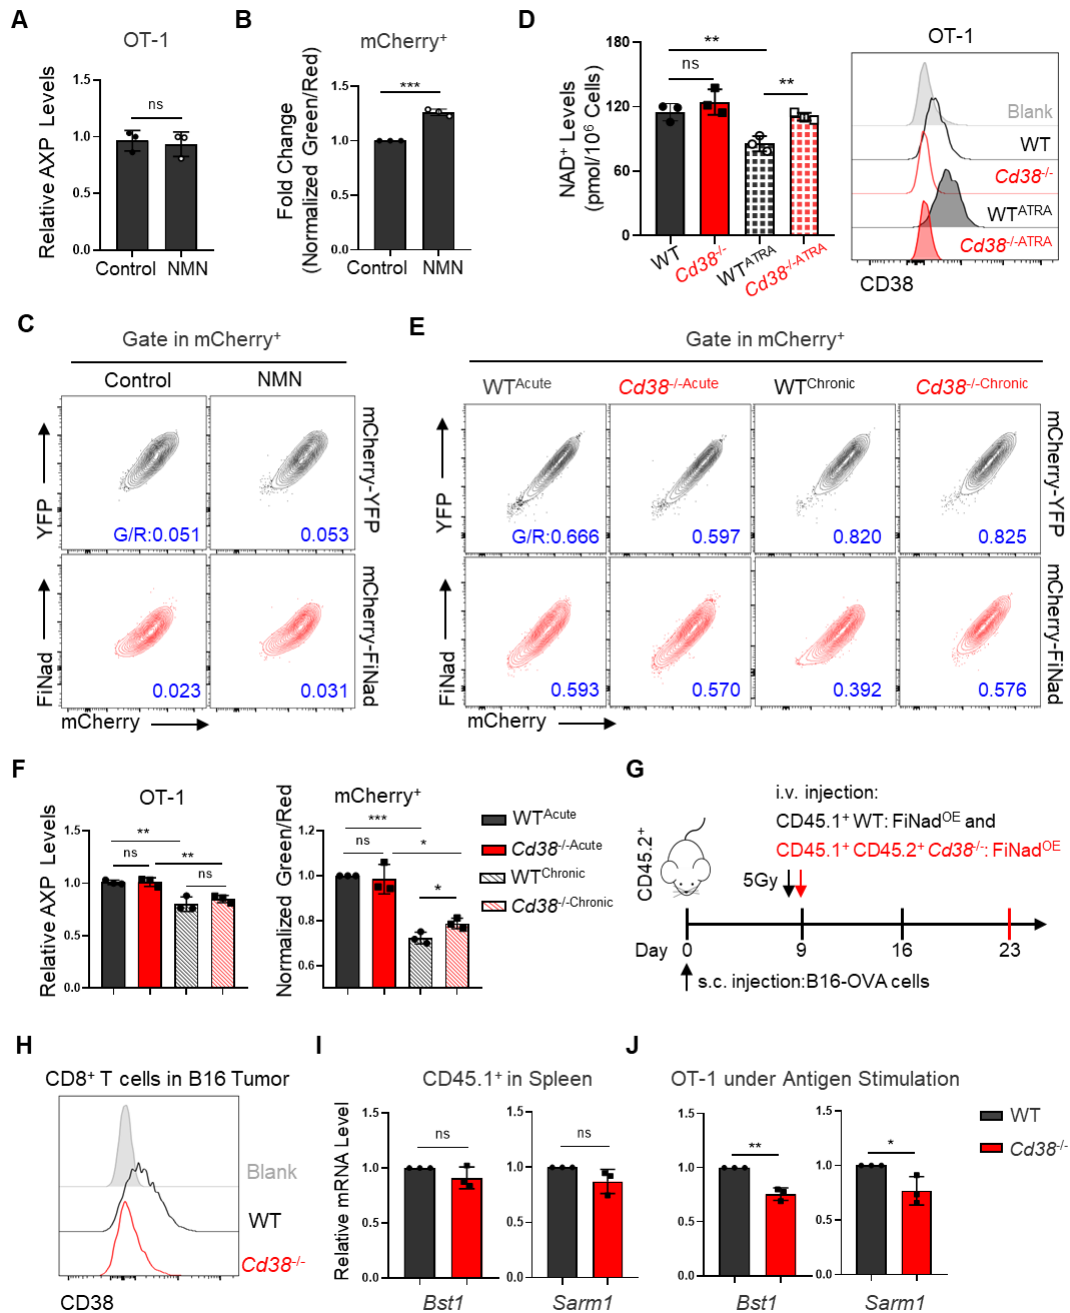

**Figure S6. CD38 played a crucial role in regulating NAD<sup>+</sup> levels in vitro, Related to Figure 7.**

(A) WT OT-1 cells were treated with 0.1mM NMN for 48 h or not. The relative AXP (ATP + ADP) levels were measured by kit as the method. Data are shown as Mean ± SD (n = 3), Student's t-test, ns, not significant. (B) The mCherry-YFP or mCherry-FiNad overexpressed-WT OT-1 cells were treated with 0.1mM NMN for 48 h or not. Comparing the fold change of normalized mCherry-FiNad (green to red) ratios in two groups. Data are shown as Mean ± SD (n = 3), Student's t-test, \*\*\*: P < 0.001. (C) Representative FACS plots of mCherry-YFP and mCherry-FiNad fluorescence intensity in WT OT-1 cells under NMN treatment or not. (D) Left: Activated WT or Cd38<sup>-/-</sup> OT-1 cells treated with 500 nM ATRA for 72h, the equal number of indicated alive cells were collected

and detecting the NAD<sup>+</sup> levels by assay kit. Right: The representative histogram of CD38 expression in indicated cells. **(E)** Representative FACS plots of mCherry-YFP and mCherry-FiNad fluorescence intensity in WT or *Cd38*<sup>-/-</sup> OT-1 cells under antigen chronic stimulation or not. **(F)** Left: Summary of the relative AXP (ATP + ADP) levels of WT or *Cd38*<sup>-/-</sup> OT-1 cells under antigen chronic stimulation or not. Right: Summary of the relative of normalized mCherry-FiNad (green to red) ratios in WT or CD38 knockout OT-1 cells under persistent antigen stimulation or not. Data are shown as Mean ± SD (n = 3), Student's t-test, \*\*\*: P < 0.001; \*\*: P < 0.01; \*: P < 0.05; ns: not significant. **(G)** Schematic representation of co-adoptive transfer mCherry-FiNad expressed-WT or CD38 knockout OT-1 cells strategy. **(H)** The B16-F10 tumors were implanted in WT or *Cd38*<sup>-/-</sup> C57BL/6 female mice, after 15 days, flow cytometry analyzed the CD38 expression of tumor-infiltrating CD8<sup>+</sup>T cells. **(I)** qPCR experiment showed the relative mRNA levels of *Bst1* and *Sarm1* in WT or *Cd38*<sup>-/-</sup> OT-1 cells from recipient mice spleen. Data are shown as Mean ± SD (n = 3), Student's t-test, ns: not significant. **(J)** The transcript levels of *Bst1* and *Sarm1* of indicated OT-1 cells after persistent antigen stimulation.



**Table S1. Oligonucleotides sequence used in this paper, Related to STAR Methods.**

| sgRNA sequence to target <i>Cd38</i> (5'-3') |                                       |                                      |
|----------------------------------------------|---------------------------------------|--------------------------------------|
| sgRNA- <i>Cd38</i> -1                        | AAGCTTCTCAGTCTAGACTCTGG               |                                      |
| sgRNA- <i>Cd38</i> -2                        | CTGATTCTCAACCCGAACTAGGG               |                                      |
| sgRNA- <i>Cd38</i> -3                        | CAGTGACCTTAGTGACAAACTGG               |                                      |
| sgRNA- <i>Cd38</i> -4                        | AGGGGAAACATCACCATAAGAGG               |                                      |
| Primers used in plasmids construction        |                                       |                                      |
|                                              | PF(5'-3')                             | PR(5'-3')                            |
| CD38 (mouse)                                 | CCGCTCGAGATGGCTAACTATGAAT<br>TTAGC    | CCCAAGCTTCGTATTAAGTCTAC<br>ACGATGG   |
| mCherry-YFP                                  | CGGAATTCGCCACCATGGTGAGCA<br>AGGGCGAGG | CCCAAGCTTTTAGTTGTACTCCA<br>GCTTGTGC  |
| mCherry-FiNad                                | CGGAATTCGCCACCATGGTGAGCA<br>AGGGCGAGG | CCCAAGCTTTTAGCCCATCATCT<br>CCTCCCGCC |
| Primers used in qPCR                         |                                       |                                      |
| <i>Cd38</i> (mouse)                          | TCTCTAGGAAAGCCCAGATCG                 | AGAAAAGTGCTTCGTGGTAGG                |
| <i>B2m</i> (mouse)                           | AGACTGATACATACGCCTGCAG                | GCAGGTTCAAATG AATCTTCAG              |
| <i>Bst1</i> (mouse)                          | AGGGACAAGTCACTGTTCTGG                 | AACTTTGCCATACAGCACGTC                |
| <i>Sarm1</i> (mouse)                         | TTCCTTGGCTCCAGAAATGCT                 | GACCCTGAGTTCTCCGGTA                  |
| <i>Slc12a8</i> (mouse)                       | GGGGAGTCATTCTTCACTGTG                 | GTCAGCAGGGTCTCTCAGGT                 |
| <i>Nampt</i> (mouse)                         | GCAGAAGCCGAGTTCAACATC                 | TTTTCACGGCATTCAAAGTAGG<br>A          |
